# Supplementary material for: Ecofriendly Approach for Treatment of Heavy-Metal-Contaminated Water Using Activated Carbon of Kernel Shell of Oil Palm
Source: MDPI journal article supplement (doi:10.3390/ma13112627), 2020-06-09
Supplement: s1 [file s1]

# Supplementary Materials: Ecofriendly Approach for Treatment of Heavy-Metal-Contaminated Water Using Activated Carbon of Kernel Shell of Oil Palm

Rabia Baby and Mohd Zobir Hussein \*

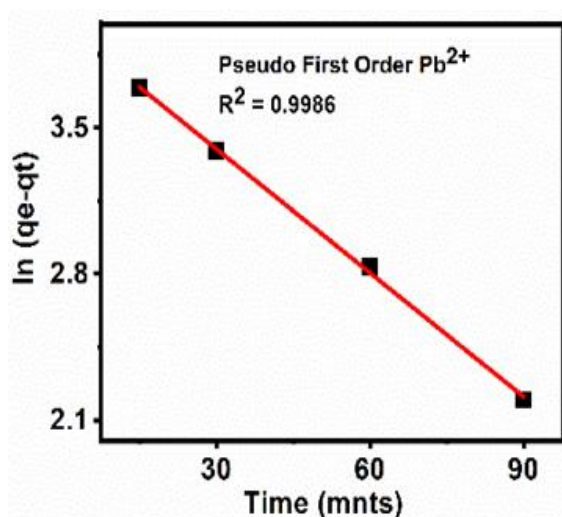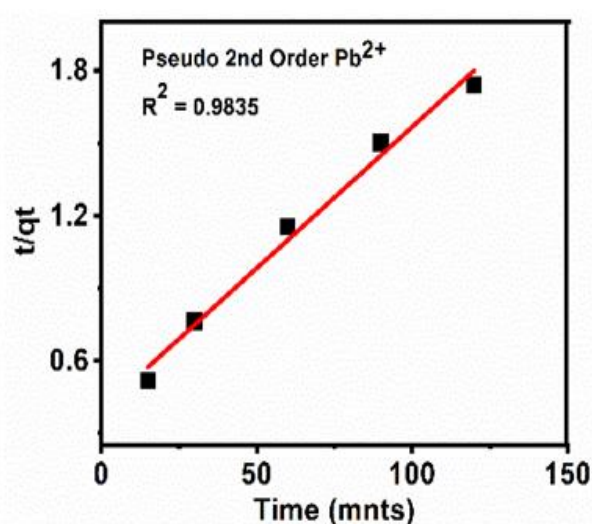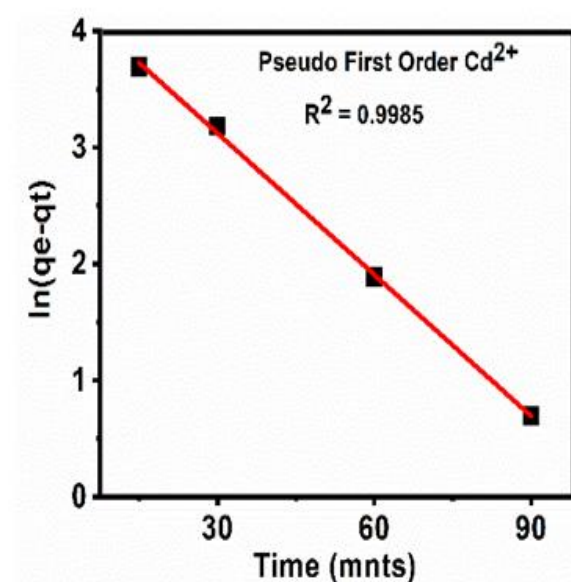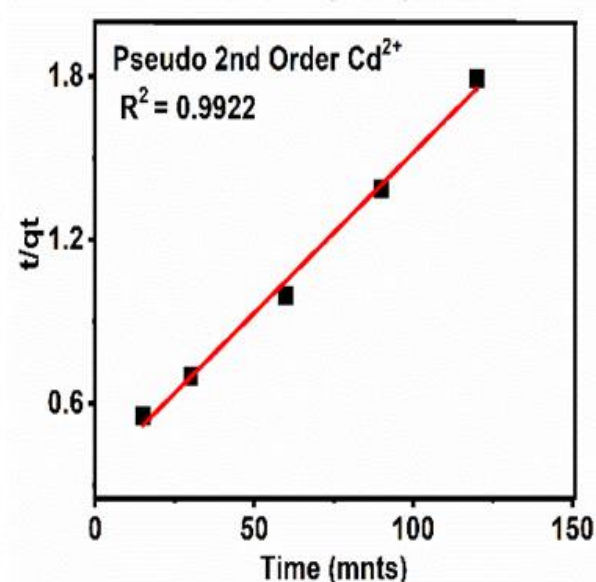

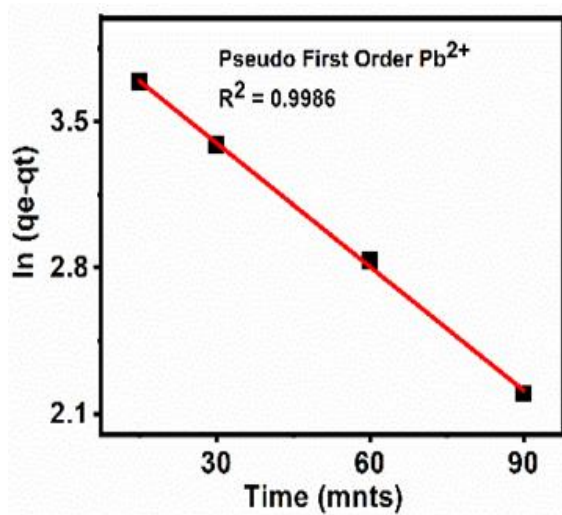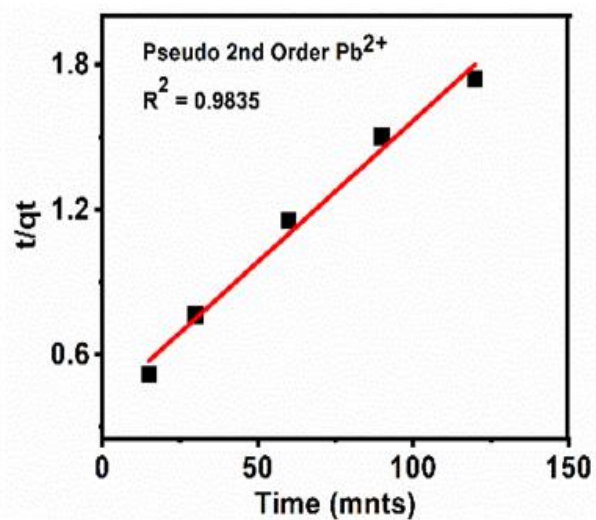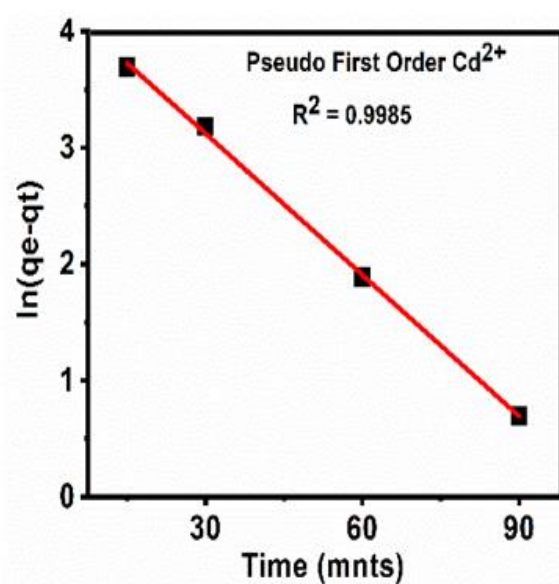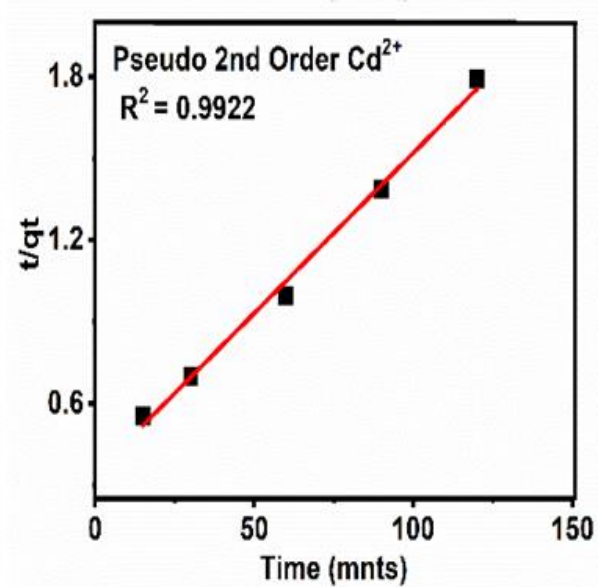

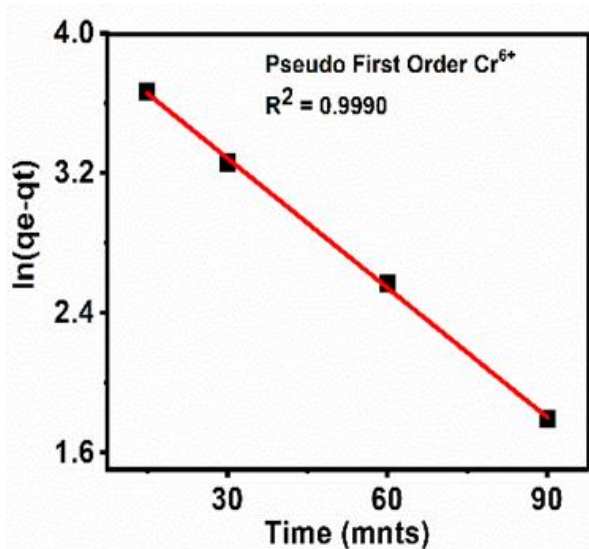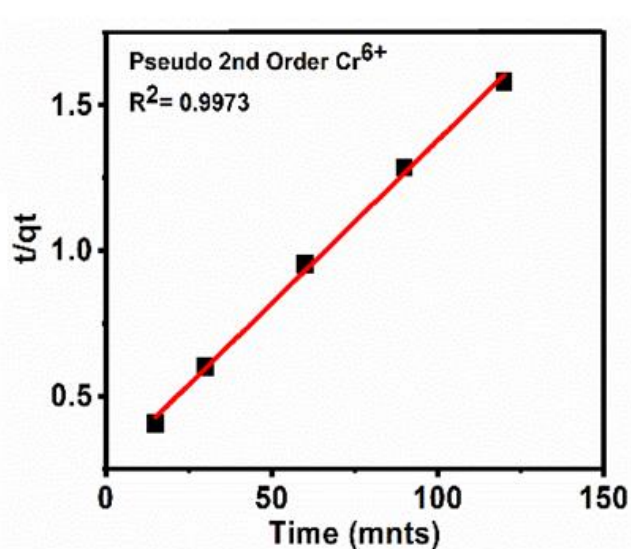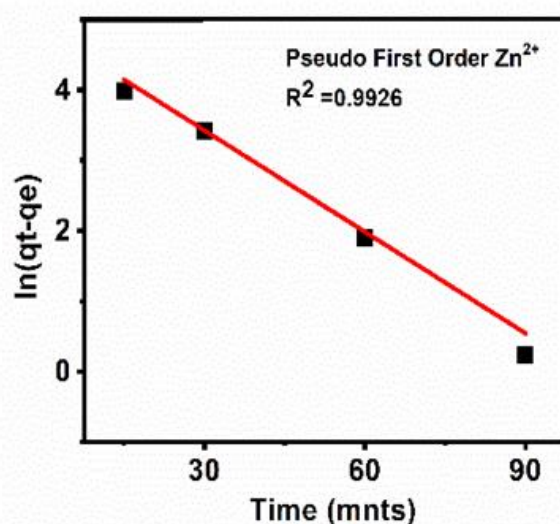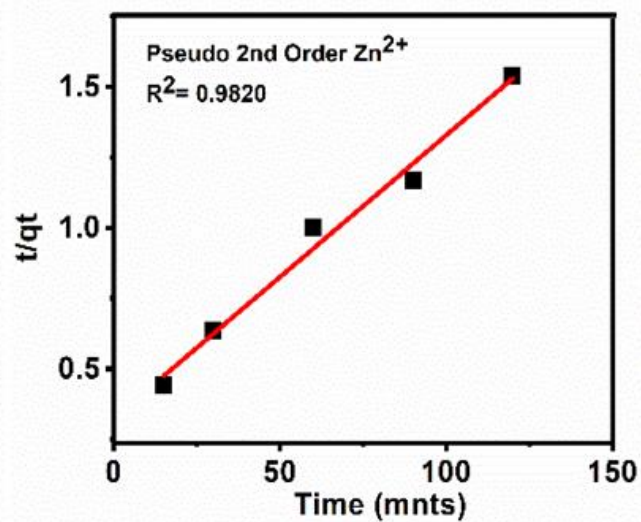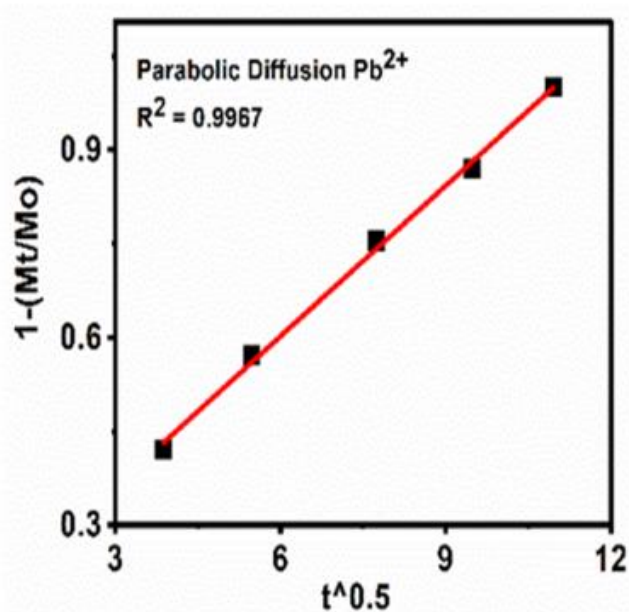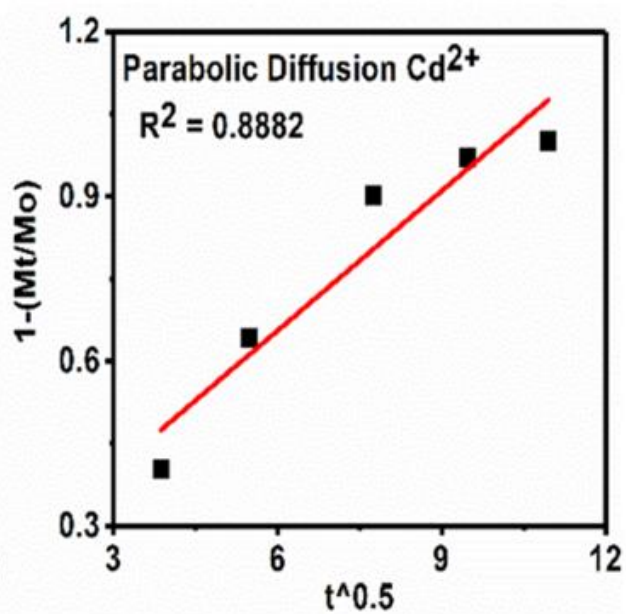

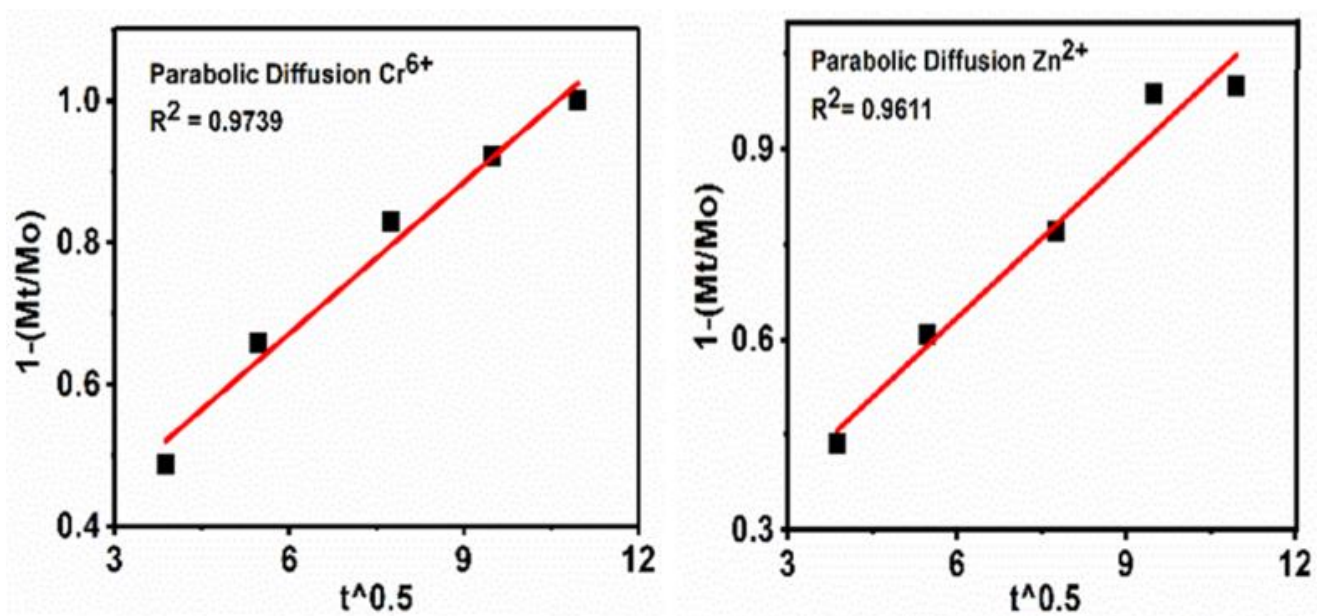

**Figure S1.** Kinetic graphs of Pseudo first order, Pseudo second order and parabolic diffusion for the adsorption Cr<sup>6+</sup>, Pb<sup>2+</sup>, Zn<sup>2+</sup> and Cd<sup>2+</sup> metal ions on the AC.

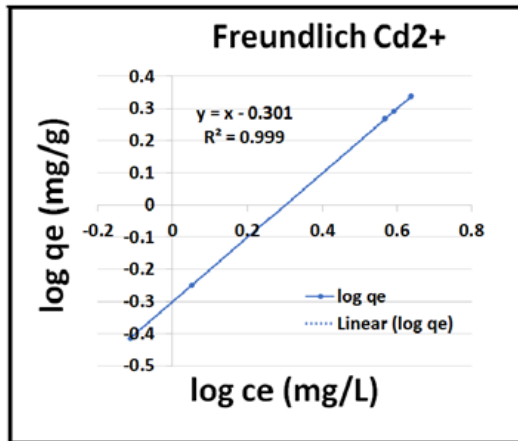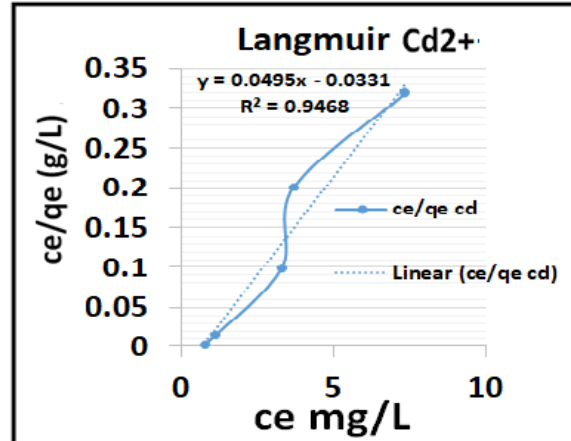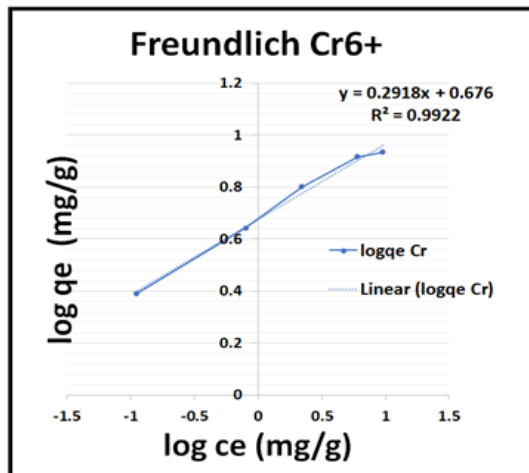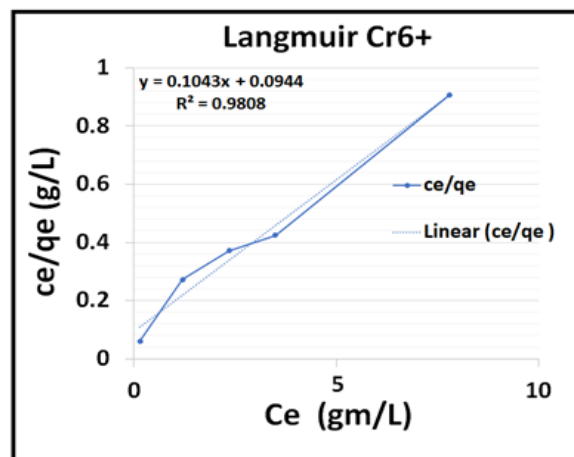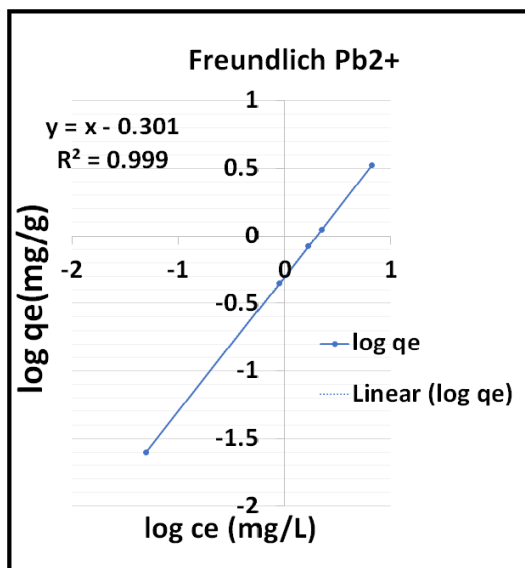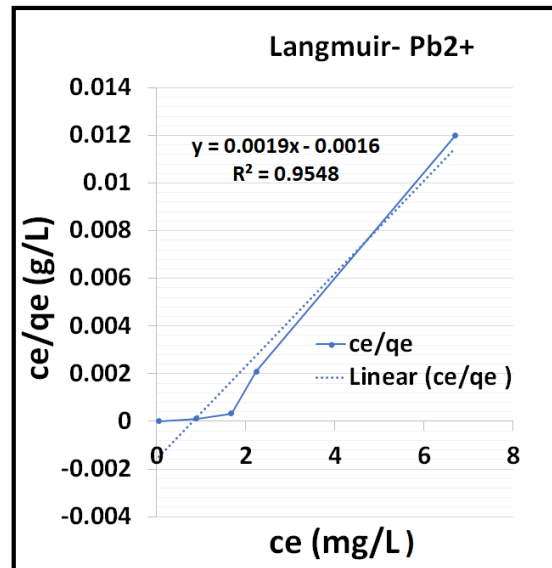

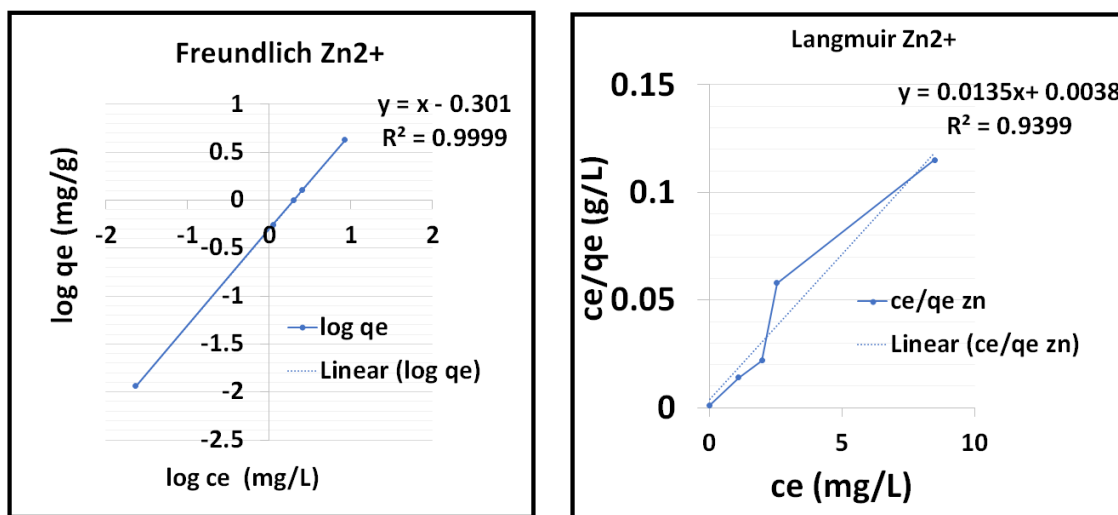

**Figure S2.** Freundlich and Langmuir Isotherms models-adsorption metal ion  $Cr^{6+}$ ,  $Pb^{2+}$ ,  $Cd^{2+}$  and  $Zn^{2+}$  on the activated carbon.

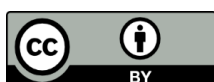

© 2020 by the authors. Licensee MDPI, Basel, Switzerland. This article is an open access article distributed under the terms and conditions of the Creative Commons Attribution (CC BY) license (<http://creativecommons.org/licenses/by/4.0/>).
